# Supplementary material
Source: PubMed Central journal article supplement (PMC4848162)
Supplement: NIHMS775061-supplement-Supplemental_Figure_1.pdf [file NIHMS775061-supplement-Supplemental_Figure_1.pdf]

A.

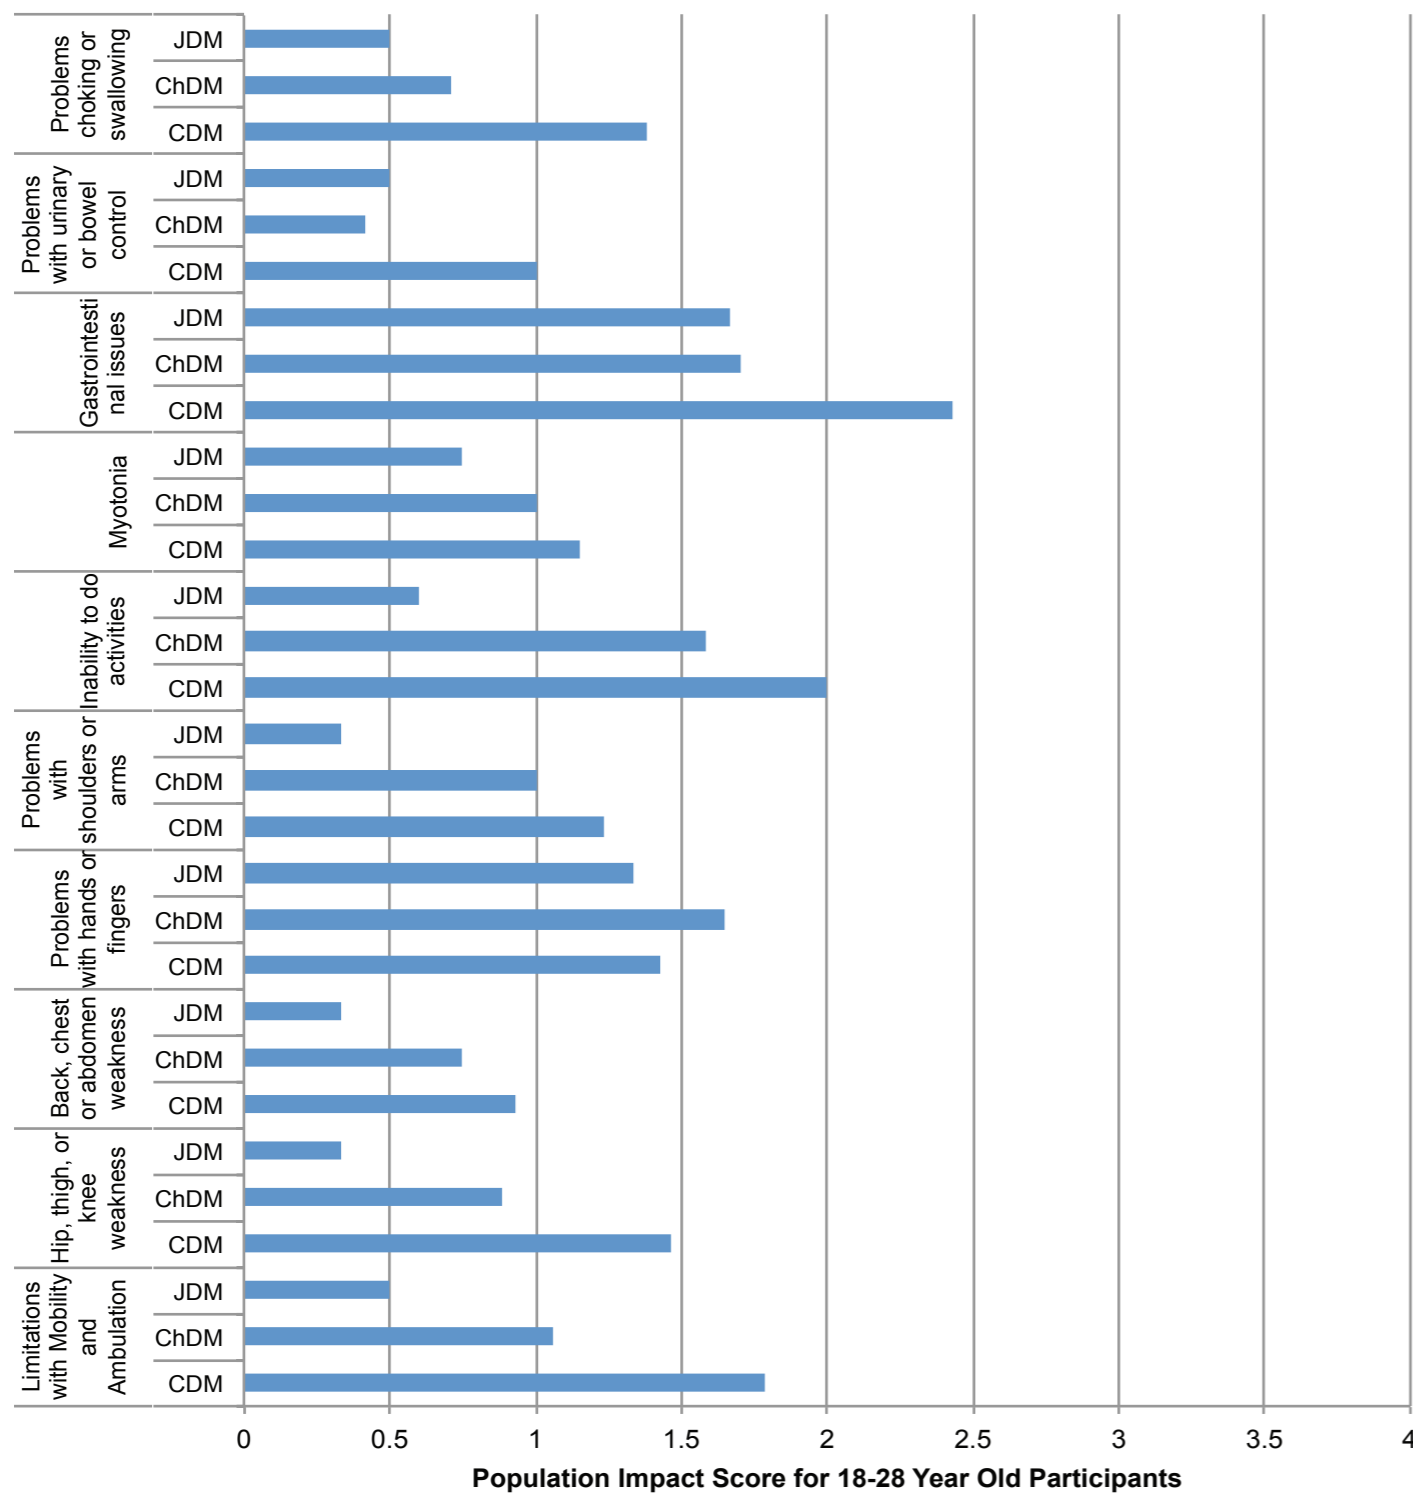

B.

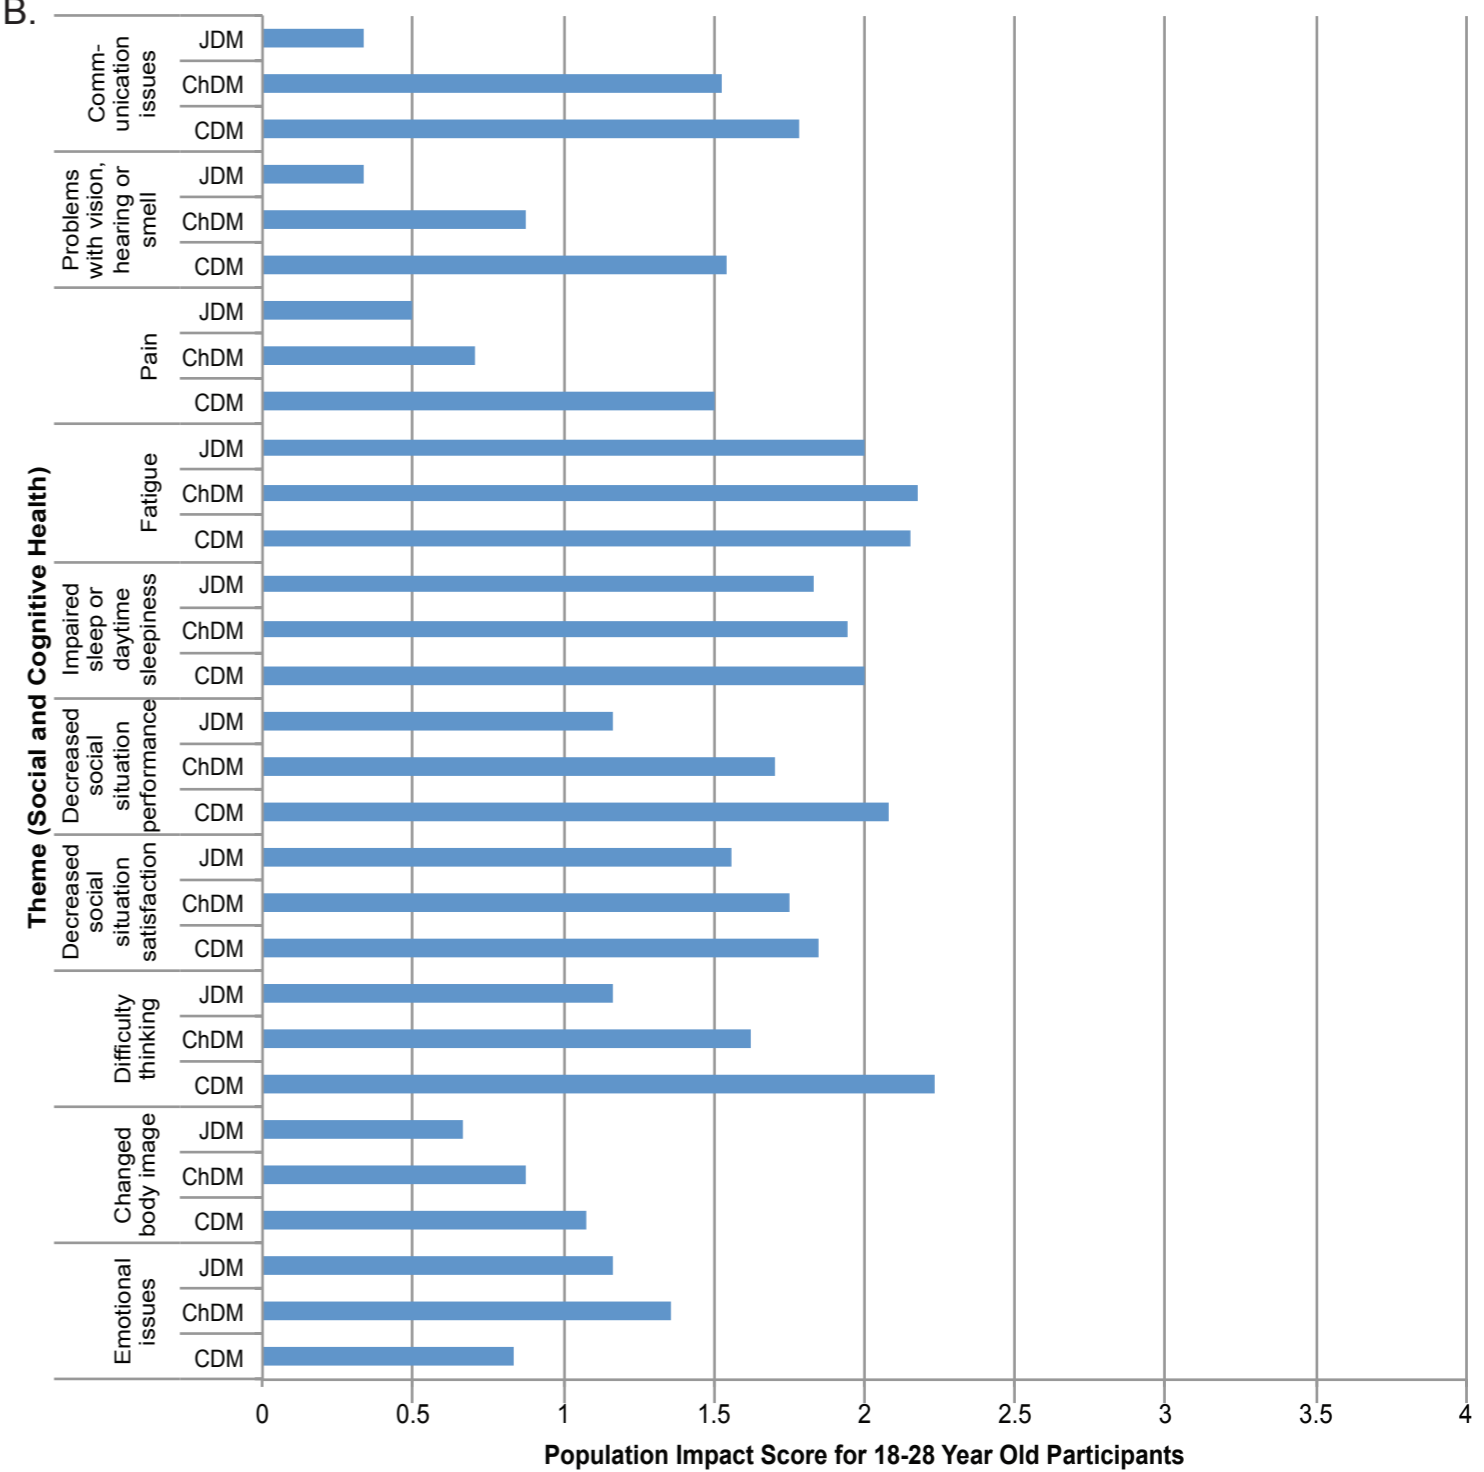

Supplemental Figure 1. The Impact of Congenital, Childhood, and Juvenile Onset Myotonic Dystrophy in Adulthood. A. The impact score for physical health themes in participant ages 18-28, as separated by symptom onset. B. The impact score for physical health themes in participant ages 18-28, as separated by symptom onset.
