# Supplementary material
Source: PubMed Central journal article supplement (PMC4848162)
Supplement: NIHMS775061-supplement-Supplemental_table_1.pdf [file NIHMS775061-supplement-Supplemental_table_1.pdf]

**Supplemental Table 1. Combined parent responses to all survey items**

| <b>Themes (bold) and Symptoms</b>                        | <b>Prevalence (%)</b> | <b>Mean Impact</b> | <b>Std Dev</b> | <b>Population Impact</b> |
|----------------------------------------------------------|-----------------------|--------------------|----------------|--------------------------|
| <b>Limitations with mobility and walking</b>             | <b>71.1</b>           | <b>1.71</b>        | <b>1.34</b>    | <b>1.22</b>              |
| Impaired walking                                         | 58.9                  | 1.83               | 1.40           | 1.08                     |
| Difficulty with stairs                                   | 57.9                  | 1.86               | 1.57           | 1.08                     |
| Difficulty with balance                                  | 65.2                  | 1.54               | 1.29           | 1.01                     |
| Falls                                                    | 53.9                  | 1.66               | 1.33           | 0.89                     |
| Inability to run                                         | 60.7                  | 1.98               | 1.60           | 1.20                     |
| Inability to walk fast                                   | 54.6                  | 2.03               | 1.42           | 1.11                     |
| Difficulty walking up hills or inclines                  | 60.0                  | 2.01               | 1.50           | 1.21                     |
| Difficulty walking on rough ground                       | 62.9                  | 1.97               | 1.48           | 1.24                     |
| Difficulty walking long distances                        | 73.4                  | 2.20               | 1.50           | 1.61                     |
| Difficulty standing                                      | 37.5                  | 1.77               | 1.54           | 0.66                     |
| Tripping                                                 | 51.1                  | 1.77               | 1.52           | 0.91                     |
| Trouble getting around                                   | 41.4                  | 1.76               | 1.53           | 0.73                     |
| Needing handrails                                        | 44.6                  | 1.87               | 1.60           | 0.83                     |
| Unsteady legs                                            | 43.2                  | 1.73               | 1.53           | 0.75                     |
| Inability to keep pace with others while walking         | 62.1                  | 1.86               | 1.53           | 1.16                     |
| Inability to keep pace with others in recreation/playing | 72.9                  | 2.12               | 1.50           | 1.54                     |
| Impaired motor skills                                    | 74.6                  | 1.80               | 1.44           | 1.34                     |
| Loss of ability to walk                                  | 16.5                  | 2.35               | 1.58           | 0.39                     |
| Difficulty with curbs                                    | 37.1                  | 1.90               | 1.59           | 0.71                     |
| <b>Hip, thigh, or knee weakness</b>                      | <b>55.4</b>           | <b>1.71</b>        | <b>1.39</b>    | <b>0.95</b>              |
| Difficulty getting up from the floor or ground           | 56.0                  | 1.75               | 1.57           | 0.98                     |
| Difficulty rising from a seated position                 | 41.8                  | 1.75               | 1.52           | 0.73                     |
| Leg weakness                                             | 53.6                  | 1.77               | 1.59           | 0.95                     |
| Difficulty getting up from a lying position              | 48.6                  | 1.65               | 1.39           | 0.80                     |
| Knee weakness                                            | 40.0                  | 1.82               | 1.45           | 0.73                     |
| Difficulty lifting objects because of leg weakness       | 42.8                  | 1.90               | 1.48           | 0.81                     |
| <b>Back, chest, or abdomen weakness</b>                  | <b>55.4</b>           | <b>1.46</b>        | <b>1.27</b>    | <b>0.81</b>              |
| Difficulty sitting up from a lying position              | 47.5                  | 1.49               | 1.47           | 0.71                     |
| Difficulty bending down                                  | 42.9                  | 1.77               | 1.53           | 0.76                     |
| Neck weakness                                            | 49.6                  | 1.38               | 1.46           | 0.68                     |
| Difficulty rolling over in bed                           | 25.0                  | 1.11               | 1.43           | 0.28                     |
| Poor posture                                             | 54.0                  | 1.43               | 1.32           | 0.77                     |
| Weak trunk (core) muscles                                | 60.4                  | 1.48               | 1.30           | 0.89                     |
| Back weakness                                            | 50.0                  | 1.57               | 1.29           | 0.79                     |
| Abdominal muscle weakness                                | 52.2                  | 1.48               | 1.30           | 0.77                     |
| Inability to get out of bed due to weakness              | 21.0                  | 1.52               | 1.55           | 0.32                     |
| Weak cough                                               | 45.7                  | 1.75               | 1.51           | 0.80                     |
| <b>Problems with hands or fingers</b>                    | <b>79.6</b>           | <b>1.63</b>        | <b>1.30</b>    | <b>1.30</b>              |
| Difficulty opening jars or bottles                       | 84.3                  | 1.75               | 1.35           | 1.47                     |
| Hand weakness                                            | 85.1                  | 1.65               | 1.37           | 1.40                     |
| Decreased hand coordination                              | 70.9                  | 1.63               | 1.35           | 1.16                     |
| Difficulty using hands                                   | 59.3                  | 1.52               | 1.34           | 0.90                     |

|                                                                    |             |             |             |             |
|--------------------------------------------------------------------|-------------|-------------|-------------|-------------|
| Dropping objects                                                   | 50.4        | 1.16        | 1.12        | 0.58        |
| Impaired ability to open doors or drawers                          | 44.3        | 1.42        | 1.21        | 0.63        |
| Difficulty picking things up with your fingers                     | 47.5        | 1.24        | 1.24        | 0.59        |
| Impaired fine motor skills                                         | 72.1        | 1.41        | 1.30        | 1.01        |
| Difficulty catching                                                | 67.9        | 1.51        | 1.39        | 1.02        |
| Difficulty throwing                                                | 57.6        | 1.50        | 1.44        | 0.86        |
| <b>Problems with shoulders or arms</b>                             | <b>55.4</b> | <b>1.53</b> | <b>1.23</b> | <b>0.85</b> |
| Arm weakness                                                       | 58.6        | 1.37        | 1.29        | 0.80        |
| Diffuculty lifting objects due to arm weakness                     | 55.0        | 1.55        | 1.35        | 0.85        |
| Shoulder weakness                                                  | 43.2        | 1.53        | 1.33        | 0.66        |
| Difficulty brushing or washing hair                                | 48.6        | 1.84        | 1.48        | 0.89        |
| Difficulty carrying a load                                         | 59.7        | 1.87        | 1.51        | 1.12        |
| Difficulty reaching objects overhead                               | 45.7        | 1.59        | 1.41        | 0.73        |
| Reduced arm and shoulder range of motion                           | 36.7        | 1.77        | 1.41        | 0.65        |
| Difficulty putting away dishes overhead                            | 42.6        | 1.79        | 1.62        | 0.76        |
| Difficulty brushing teeth                                          | 46.0        | 1.63        | 1.46        | 0.75        |
| Trouble hanging up clothes                                         | 48.6        | 1.47        | 1.43        | 0.72        |
| <b>Myotonia</b>                                                    | <b>73.9</b> | <b>1.48</b> | <b>1.34</b> | <b>1.09</b> |
| Stiffness                                                          | 52.9        | 1.33        | 1.25        | 0.70        |
| Locked up muscles                                                  | 48.6        | 1.31        | 1.14        | 0.64        |
| Jaw stiffness (myotonia)                                           | 27.1        | 1.08        | 0.97        | 0.29        |
| Cramping                                                           | 42.9        | 1.28        | 1.11        | 0.55        |
| Inability to release grip                                          | 50.0        | 1.27        | 1.20        | 0.64        |
| Embarrassment when not able to let go of someones hand             | 20.3        | 1.18        | 1.28        | 0.24        |
| Knees that lock up                                                 | 19.7        | 1.15        | 1.13        | 0.23        |
| Hand myotonia                                                      | 53.2        | 1.68        | 1.24        | 0.89        |
| Tongue cramping                                                    | 20.0        | 1.14        | 1.08        | 0.23        |
| <b>Gastrointestinal issues</b>                                     | <b>70.4</b> | <b>2.08</b> | <b>1.35</b> | <b>1.46</b> |
| Constipation                                                       | 48.2        | 1.82        | 1.31        | 0.88        |
| Abdominal pain                                                     | 46.7        | 1.42        | 1.19        | 0.66        |
| Weight gain                                                        | 34.8        | 1.58        | 1.27        | 0.55        |
| Diarrhea                                                           | 51.9        | 1.49        | 1.38        | 0.77        |
| A change in diet due to illness                                    | 19.4        | 1.69        | 1.49        | 0.33        |
| Stomach cramping                                                   | 33.1        | 1.38        | 1.13        | 0.46        |
| Gas                                                                | 47.5        | 1.23        | 1.30        | 0.58        |
| Bloating                                                           | 30.4        | 1.05        | 1.05        | 0.32        |
| A change in your activities secondary to gastrointestinal symptoms | 29.2        | 1.55        | 1.36        | 0.45        |
| <b>Problems with urinary or bowel control</b>                      | <b>51.1</b> | <b>2.06</b> | <b>1.43</b> | <b>1.05</b> |
| Requiring diapers                                                  | 33.6        | 2.56        | 1.50        | 0.86        |
| Inability to join group without toilet training                    | 20.3        | 2.26        | 1.66        | 0.46        |
| Soiled clothes                                                     | 31.1        | 2.49        | 1.43        | 0.77        |
| Stool incontinence                                                 | 33.8        | 2.51        | 1.42        | 0.85        |
| Urinary incontinence                                               | 27.3        | 2.33        | 1.53        | 0.64        |
| Urinary frequency                                                  | 17.3        | 2.00        | 1.54        | 0.35        |
| <b>Inability to do activities</b>                                  | <b>70.0</b> | <b>1.89</b> | <b>1.28</b> | <b>1.32</b> |
| Difficulty cleaning a house                                        | 56.4        | 1.89        | 1.37        | 1.07        |

|                                                        |      |      |      |      |
|--------------------------------------------------------|------|------|------|------|
| Difficulty getting in and out of vehicles              | 41.3 | 1.42 | 1.40 | 0.59 |
| Problems preparing food                                | 55.1 | 1.73 | 1.49 | 0.96 |
| Problems getting dressed                               | 50.7 | 1.51 | 1.34 | 0.77 |
| Problems maintaining a home                            | 48.9 | 2.34 | 1.50 | 1.14 |
| Difficulty playing sports                              | 69.9 | 2.26 | 1.47 | 1.58 |
| Impaired dancing                                       | 48.5 | 1.92 | 1.60 | 0.93 |
| Trouble riding a bike                                  | 57.8 | 2.14 | 1.62 | 1.24 |
| Problems shopping                                      | 46.3 | 2.16 | 1.36 | 1.00 |
| Trouble going up step ladders                          | 47.4 | 2.03 | 1.58 | 0.96 |
| Difficulty walking dogs                                | 33.6 | 1.67 | 1.60 | 0.56 |
| Difficulty bathing or taking a shower                  | 47.1 | 1.75 | 1.44 | 0.82 |
| Difficulty holding a milk gallon                       | 54.1 | 1.81 | 1.50 | 0.98 |
| Inability to mow the lawn                              | 35.9 | 2.62 | 1.62 | 0.94 |
| Impaired ability to exercise                           | 51.1 | 1.87 | 1.36 | 0.96 |
| Problems using buttons or zippers                      | 63.2 | 1.85 | 1.48 | 1.17 |
| Problems doing the laundry                             | 38.9 | 1.90 | 1.62 | 0.74 |
| Difficulty swimming                                    | 42.9 | 1.83 | 1.47 | 0.78 |
| Taking longer to do household chores                   | 59.4 | 1.96 | 1.56 | 1.17 |
| Difficulty washing dishes                              | 48.9 | 1.77 | 1.48 | 0.86 |
| Difficulty scrubbing surfaces                          | 46.6 | 1.89 | 1.52 | 0.88 |
| Difficulty doing yard work                             | 43.4 | 2.05 | 1.53 | 0.89 |
| Difficulty getting out of a tub                        | 38.3 | 1.96 | 1.57 | 0.75 |
| Difficulty changing a light bulb                       | 35.1 | 1.91 | 1.62 | 0.67 |
| Inability to hike                                      | 59.1 | 2.19 | 1.55 | 1.30 |
| Difficulty putting on shoes                            | 55.6 | 1.61 | 1.50 | 0.90 |
| Difficulty cutting or manicuring nails                 | 43.8 | 2.39 | 1.56 | 1.05 |
| Trouble standing on a chair                            | 46.6 | 2.05 | 1.68 | 0.96 |
| Difficulty taking care of pets                         | 38.5 | 1.82 | 1.52 | 0.70 |
| Difficulty making a bed                                | 47.4 | 1.56 | 1.50 | 0.74 |
| Difficulty staying active                              | 54.5 | 1.75 | 1.33 | 0.96 |
| Difficulty maintaining personal hygiene                | 53.7 | 2.01 | 1.41 | 1.08 |
| Difficulty using a computer keyboard                   | 35.6 | 1.48 | 1.19 | 0.53 |
| Increased safety risk due to disease                   | 45.5 | 2.00 | 1.51 | 0.91 |
| Trouble setting an alarm clock                         | 34.1 | 1.91 | 1.62 | 0.65 |
| Problems opening boxes                                 | 45.5 | 1.57 | 1.44 | 0.71 |
| Difficulty using a remote control                      | 24.8 | 1.27 | 1.40 | 0.32 |
| Difficulty using keys                                  | 39.1 | 1.56 | 1.50 | 0.61 |
| Difficulty cutting meat                                | 53.0 | 1.83 | 1.41 | 0.97 |
| Difficulty using a hammer or other tool                | 41.4 | 2.00 | 1.63 | 0.83 |
| Difficulty with mopping                                | 39.5 | 1.96 | 1.55 | 0.78 |
| Problems washing windows                               | 44.1 | 1.95 | 1.60 | 0.86 |
| Difficulty lifting weights                             | 54.5 | 2.01 | 1.53 | 1.10 |
| Inability to be spontaneous in activities              | 50.4 | 1.75 | 1.43 | 0.88 |
| Inability to get on amusement park rides               | 46.2 | 1.90 | 1.60 | 0.88 |
| Difficulty painting a picture                          | 47.4 | 1.75 | 1.52 | 0.83 |
| Inability to turn on a light with a pull cord          | 18.2 | 1.29 | 1.30 | 0.24 |
| Difficulty shoveling                                   | 43.8 | 2.07 | 1.58 | 0.91 |
| Inability to participate in extracurricular activities | 53.0 | 2.04 | 1.40 | 1.08 |

|                                                               |             |             |             |             |
|---------------------------------------------------------------|-------------|-------------|-------------|-------------|
| Difficulty walking to school                                  | 36.5        | 2.26        | 1.51        | 0.83        |
| Difficulty driving a motor vehicle                            | 41.6        | 2.87        | 1.39        | 1.19        |
| Difficulty using an eating utensil                            | 47.4        | 1.38        | 1.28        | 0.65        |
| Difficulty playing video games                                | 31.6        | 1.30        | 1.42        | 0.41        |
| <b>Problems choking or swallowing</b>                         | <b>56.7</b> | <b>1.43</b> | <b>1.33</b> | <b>0.81</b> |
| Problems swallowing                                           | 54.6        | 1.56        | 1.29        | 0.85        |
| Choking                                                       | 47.5        | 1.44        | 1.27        | 0.68        |
| Change of diet due to choking                                 | 23.0        | 1.69        | 1.49        | 0.39        |
| Indigestion                                                   | 36.0        | 1.45        | 1.34        | 0.52        |
| Fear of choking                                               | 28.5        | 1.18        | 1.25        | 0.34        |
| A change to softer foods                                      | 23.0        | 1.50        | 1.24        | 0.35        |
| Difficulty using a straw                                      | 30.4        | 1.41        | 1.45        | 0.43        |
| <b>Emotional issues</b>                                       | <b>62.3</b> | <b>1.38</b> | <b>1.28</b> | <b>0.86</b> |
| Depression                                                    | 41.9        | 1.16        | 1.13        | 0.49        |
| Awareness of the disease getting worse                        | 44.9        | 1.24        | 1.24        | 0.56        |
| Burden of thinking about the future                           | 39.9        | 1.42        | 1.27        | 0.57        |
| Anxiety                                                       | 47.4        | 1.34        | 1.04        | 0.63        |
| Fear of falling                                               | 43.5        | 1.47        | 1.28        | 0.64        |
| Moodiness                                                     | 45.7        | 1.37        | 1.18        | 0.62        |
| Fear of progression of disease                                | 38.0        | 1.37        | 1.19        | 0.52        |
| Frustration                                                   | 59.6        | 1.46        | 1.29        | 0.87        |
| Embarrassment                                                 | 38.7        | 1.13        | 1.21        | 0.44        |
| Feeling overwhelmed                                           | 50.7        | 1.24        | 1.12        | 0.63        |
| Stress                                                        | 45.7        | 1.33        | 1.14        | 0.61        |
| Generalized fear                                              | 38.7        | 1.15        | 1.05        | 0.45        |
| Fear of injury with activity                                  | 38.1        | 1.40        | 1.29        | 0.53        |
| Grief                                                         | 29.0        | .85         | 0.98        | 0.25        |
| Keeping more to oneself (introverted)                         | 45.3        | 1.76        | 1.29        | 0.80        |
| Apathy                                                        | 37.8        | 1.65        | 1.26        | 0.62        |
| Decreased confidence                                          | 51.8        | 1.41        | 1.25        | 0.73        |
| Anger                                                         | 41.0        | 1.44        | 1.18        | 0.59        |
| Loss of pride                                                 | 31.2        | 1.14        | 1.01        | 0.36        |
| Sadness                                                       | 38.2        | 1.21        | 1.19        | 0.46        |
| Isolation                                                     | 44.2        | 1.85        | 1.41        | 0.82        |
| Self pity                                                     | 25.9        | .86         | 1.12        | 0.22        |
| Being mistaken as having another disease by others            | 29.9        | 1.02        | 1.15        | 0.31        |
| Difficulty with emotional closeness                           | 32.6        | 1.52        | 1.34        | 0.50        |
| Increased emotional sensitivity                               | 39.4        | 1.28        | 1.24        | 0.50        |
| Hopelessness                                                  | 26.1        | 1.06        | 1.15        | 0.28        |
| Irritable                                                     | 41.7        | 1.36        | 1.20        | 0.57        |
| Fear of a worsening ability to think                          | 19.9        | 0.89        | 0.97        | 0.18        |
| Fear of death                                                 | 25.0        | 0.97        | 1.17        | 0.24        |
| Feeling of losing control                                     | 21.5        | 1.24        | 1.33        | 0.27        |
| Fear of being mistaken for another myotonic dystrophy patient | 9.4         | 1.46        | 1.81        | 0.14        |
| Envy of people without a disability                           | 29.0        | 1.10        | 1.19        | 0.32        |
| Changed perspective on how to live life                       | 28.1        | 1.40        | 1.39        | 0.39        |

|                                                |             |             |             |             |
|------------------------------------------------|-------------|-------------|-------------|-------------|
| Shyness                                        | 38.7        | 1.26        | 1.30        | 0.49        |
| Concern about worsening heart                  | 23.4        | 1.06        | 1.13        | 0.25        |
| Impulsiveness                                  | 36.0        | 1.57        | 1.31        | 0.57        |
| A narrow scope of interest                     | 53.6        | 1.92        | 1.42        | 1.03        |
| Talking to oneself                             | 46.0        | 1.56        | 1.52        | 0.72        |
| Bossiness                                      | 34.8        | 1.21        | 1.20        | 0.42        |
| Difficulty with transitions or changes in plan | 56.9        | 1.73        | 1.44        | 0.99        |
| Frequent meltdowns/tantrums                    | 33.3        | 1.46        | 1.33        | 0.49        |
| Overly sensitive touch, light, or sound        | 45.3        | 1.55        | 1.35        | 0.70        |
| Fear of specific things or situations          | 52.6        | 1.45        | 1.24        | 0.76        |
| Frustration with not being understood          | 64.7        | 1.44        | 1.29        | 0.94        |
| <b>Changed body image due to disease</b>       | <b>55.1</b> | <b>1.05</b> | <b>1.17</b> | <b>0.58</b> |
| Impaired self image                            | 37.3        | 1.14        | 1.13        | 0.43        |
| Skin abnormalities                             | 17.0        | 1.22        | 1.24        | 0.21        |
| Impaired body image                            | 31.3        | 1.17        | 1.15        | 0.37        |
| Worry about how others perceive him/her        | 36.8        | 1.41        | 1.19        | 0.52        |
| Muscle loss                                    | 62.0        | 1.69        | 1.44        | 1.05        |
| Self-consciencious of muscle loss              | 30.1        | 1.55        | 1.36        | 0.47        |
| Hair loss                                      | 23.5        | 1.50        | 1.37        | 0.35        |
| Impaired body image due to gait                | 29.1        | 1.15        | 1.29        | 0.34        |
| Embarrassment in wearing a bathing suit        | 14.1        | 1.32        | 1.20        | 0.19        |
| Feeling different from other people            | 42.2        | 1.11        | 1.15        | 0.47        |
| Foot deformity                                 | 25.5        | 1.60        | 1.42        | 0.41        |
| Lowered self worth                             | 30.1        | .98         | 1.12        | 0.29        |
| Feet that turn out                             | 14.8        | 1.30        | 1.42        | 0.19        |
| <b>Difficulty thinking</b>                     | <b>66.7</b> | <b>1.99</b> | <b>1.22</b> | <b>1.33</b> |
| Memory deficits                                | 45.3        | 1.66        | 1.27        | 0.75        |
| Problems concentrating                         | 75.7        | 1.73        | 1.24        | 1.31        |
| Trouble finding the right word                 | 61.9        | 1.29        | 1.26        | 0.80        |
| Need for increased planning for activities     | 55.6        | 1.54        | 1.43        | 0.86        |
| Decreased motivation                           | 47.8        | 1.91        | 1.38        | 0.91        |
| Tires with mental tasks                        | 65.7        | 1.84        | 1.33        | 1.21        |
| Decreased ability to think fast                | 70.1        | 1.81        | 1.45        | 1.27        |
| Difficulty with math                           | 72.4        | 2.40        | 1.35        | 1.74        |
| Problems reading                               | 58.2        | 1.87        | 1.39        | 1.09        |
| Being in a dream-like state                    | 45.1        | 1.18        | 1.23        | 0.53        |
| Trouble organizing activities or tasks         | 68.7        | 1.94        | 1.55        | 1.33        |
| Increased time to complete a task              | 71.6        | 2.05        | 1.45        | 1.47        |
| Difficulty with comprehension                  | 68.9        | 1.76        | 1.39        | 1.22        |
| Reduced decision making abilities              | 68.4        | 1.91        | 1.44        | 1.31        |
| Inability to focus                             | 74.1        | 1.81        | 1.35        | 1.34        |
| Easily confused                                | 53.7        | 1.76        | 1.36        | 0.95        |
| Learning difficulties                          | 83.3        | 2.34        | 1.47        | 1.95        |
| Visual spatial difficulties                    | 45.4        | 1.88        | 1.37        | 0.85        |
| Literal/concrete thinking                      | 59.2        | 2.08        | 1.41        | 1.23        |
| Repetitive speech                              | 55.7        | 1.86        | 1.46        | 1.04        |
| Mental retardation                             | 40.3        | 2.28        | 1.42        | 0.92        |
| Decreased attention span                       | 70.1        | 1.73        | 1.38        | 1.22        |

|                                                                |             |             |             |             |
|----------------------------------------------------------------|-------------|-------------|-------------|-------------|
| <b>Decreased satisfaction in social situations</b>             | <b>61.3</b> | <b>1.92</b> | <b>1.34</b> | <b>1.18</b> |
| Inability to do things he or she used to do                    | 35.8        | 1.67        | 1.42        | 0.60        |
| Decreased ability to participate in activities                 | 54.0        | 2.00        | 1.43        | 1.08        |
| Perceived burden to family members                             | 23.5        | 1.22        | 1.41        | 0.29        |
| Lack of understanding by others                                | 65.0        | 1.57        | 1.37        | 1.02        |
| Increased family stress                                        | 44.9        | 1.59        | 1.38        | 0.71        |
| Negative perceptions by others                                 | 40.7        | 1.29        | 1.27        | 0.53        |
| Lack of available information about myotonic dystrophy         | 28.9        | 1.44        | 1.60        | 0.42        |
| Perception of being lazy                                       | 57.7        | 1.43        | 1.31        | 0.83        |
| Difficulty being in crowds                                     | 42.3        | 1.86        | 1.33        | 0.79        |
| Impaired interactions with friends                             | 57.7        | 2.18        | 1.31        | 1.26        |
| Dissatisfaction with social interactions                       | 41.5        | 2.11        | 1.38        | 0.88        |
| The perception by others that myotonic dystrophy is contagious | 7.4         | 1.40        | 1.51        | 0.10        |
| Decreased acceptance by others                                 | 52.9        | 1.67        | 1.29        | 0.88        |
| Desire to hide conditions from others                          | 29.4        | 1.73        | 1.45        | 0.51        |
| Reduced enjoyment with activities                              | 34.6        | 1.65        | 1.34        | 0.57        |
| Decreased ability to play with friends                         | 55.6        | 1.96        | 1.42        | 1.09        |
| Impaired interaction with unaffected sibling                   | 28.1        | 1.67        | 1.27        | 0.47        |
| Inappropriate social responses                                 | 50.7        | 1.59        | 1.28        | 0.81        |
| Not able to participate in age appropriate activities          | 70.5        | 2.11        | 1.51        | 1.49        |
| Behavioral problems affecting school or work performance       | 41.0        | 1.82        | 1.36        | 0.75        |
| <b>Fatigue</b>                                                 | <b>78.6</b> | <b>1.86</b> | <b>1.26</b> | <b>1.46</b> |
| Physical fatigue                                               | 78.3        | 1.89        | 1.29        | 1.48        |
| Poor endurance                                                 | 75.9        | 1.83        | 1.27        | 1.39        |
| Whole body weakness                                            | 65.0        | 1.84        | 1.38        | 1.20        |
| Decreased energy                                               | 70.1        | 1.93        | 1.37        | 1.35        |
| Prolonged recovery time after physical activities              | 58.7        | 1.77        | 1.34        | 1.04        |
| Muscle fatigue                                                 | 73.0        | 1.86        | 1.36        | 1.36        |
| Lethargy                                                       | 52.2        | 1.85        | 1.37        | 0.96        |
| Decreased lower extremity stamina                              | 65.9        | 1.81        | 1.43        | 1.20        |
| Decreased activity level                                       | 61.5        | 2.02        | 1.33        | 1.25        |
| Breathing difficulties                                         | 31.9        | 1.05        | 1.24        | 0.33        |
| Tired muscles                                                  | 67.9        | 1.66        | 1.32        | 1.12        |
| Irritable towards the end of the day                           | 48.6        | 1.61        | 1.24        | 0.78        |
| <b>Impaired performance in social situations</b>               | <b>70.7</b> | <b>2.04</b> | <b>1.43</b> | <b>1.44</b> |
| Reliance of family members                                     | 80.9        | 2.30        | 1.48        | 1.86        |
| Limitations on what one can do physically                      | 75.9        | 2.06        | 1.46        | 1.56        |
| Issues at work or school                                       | 59.1        | 1.92        | 1.34        | 1.14        |
| Having to adapt to disease related restrictions                | 54.5        | 1.77        | 1.44        | 0.96        |
| Need for job training program                                  | 32.3        | 2.29        | 1.38        | 0.74        |
| Lack of job secondary to disability                            | 34.4        | 2.86        | 1.29        | 0.99        |
| Decreased independence                                         | 59.0        | 2.20        | 1.46        | 1.30        |
| Impaired social interactions                                   | 63.6        | 2.13        | 1.37        | 1.36        |
| Difficulty interacting with family                             | 34.6        | 1.34        | 1.17        | 0.46        |

|                                                             |             |             |             |             |
|-------------------------------------------------------------|-------------|-------------|-------------|-------------|
| Limited activities secondary to weakness                    | 58.8        | 1.77        | 1.31        | 1.04        |
| Difficulty interacting with friends                         | 60.6        | 1.95        | 1.37        | 1.18        |
| The avoidance of social situations                          | 46.3        | 1.94        | 1.40        | 0.90        |
| Financial issues associated with your disability            | 38.0        | 2.33        | 1.46        | 0.88        |
| Decreased ability to see friends                            | 47.3        | 2.23        | 1.45        | 1.05        |
| Difficulty making friends                                   | 61.4        | 2.37        | 1.36        | 1.46        |
| Inability to go out                                         | 45.5        | 2.32        | 1.41        | 1.05        |
| Reliance on friends                                         | 37.5        | 1.46        | 1.49        | 0.55        |
| Inability to take care of oneself                           | 54.8        | 2.20        | 1.49        | 1.21        |
| Inability to provide childcare                              | 29.5        | 2.76        | 1.57        | 0.82        |
| The need for special education                              | 69.4        | 2.41        | 1.50        | 1.67        |
| The need for close parental/caregiver supervision           | 64.2        | 2.34        | 1.51        | 1.50        |
| Inability to take family trips                              | 27.9        | 1.50        | 1.48        | 0.42        |
| Being the last child picked for games                       | 38.9        | 2.18        | 1.44        | 0.85        |
| The need for physical, occupational, or speech therapy      | 68.4        | 2.29        | 1.42        | 1.57        |
| <b>Impaired sleep or daytime sleepiness</b>                 | <b>70.2</b> | <b>1.85</b> | <b>1.39</b> | <b>1.30</b> |
| Daytime sleepiness                                          | 71.0        | 1.57        | 1.32        | 1.12        |
| Excessive sleep requirements                                | 66.9        | 1.80        | 1.49        | 1.20        |
| Breathing problems at night                                 | 31.4        | 1.70        | 1.42        | 0.53        |
| Difficulty sleeping due to choking on saliva                | 21.5        | 1.21        | 1.29        | 0.26        |
| Difficulty falling asleep at night                          | 36.0        | 2.02        | 1.44        | 0.73        |
| Fear of safety secondary to excessive sleepiness            | 12.0        | 1.13        | 1.41        | 0.14        |
| Morning headaches                                           | 12.6        | 1.35        | 1.12        | 0.17        |
| Restless sleep                                              | 32.4        | 1.50        | 1.25        | 0.49        |
| <b>Pain</b>                                                 | <b>50.0</b> | <b>1.39</b> | <b>1.14</b> | <b>0.70</b> |
| Pain all over                                               | 23.7        | 1.28        | 1.02        | 0.30        |
| Chest pain                                                  | 21.3        | .93         | 1.16        | 0.20        |
| Leg pain                                                    | 37.2        | 1.28        | 1.17        | 0.47        |
| Hip pain                                                    | 22.8        | 1.07        | 1.06        | 0.24        |
| Neck pain                                                   | 28.1        | 1.34        | 1.19        | 0.38        |
| Sore and achy muscles                                       | 44.1        | 1.15        | 1.21        | 0.51        |
| Back pain                                                   | 34.6        | 1.45        | 1.16        | 0.50        |
| Limited activity due to pain                                | 24.8        | 1.33        | 1.14        | 0.33        |
| Foot pain                                                   | 30.4        | 1.17        | 1.28        | 0.36        |
| Headache                                                    | 20.6        | 1.14        | 1.11        | 0.24        |
| Arm pain                                                    | 20.7        | 1.18        | 1.06        | 0.24        |
| Shoulder pain                                               | 25.2        | 1.18        | 1.03        | 0.30        |
| Muscle pain after exertion                                  | 41.8        | 1.57        | 1.29        | 0.66        |
| Pain from wearing a brace                                   | 21.7        | 1.71        | 1.15        | 0.37        |
| <b>Problems with your vision, hearing or sense of smell</b> | <b>49.3</b> | <b>1.32</b> | <b>1.17</b> | <b>0.65</b> |
| Cataracts                                                   | 18.8        | 1.08        | 1.41        | 0.20        |
| Difficulty focusing eyes                                    | 23.2        | .91         | 1.03        | 0.21        |
| Visual loss                                                 | 27.3        | .87         | 0.99        | 0.24        |
| Poor night vision                                           | 20.3        | .96         | 0.88        | 0.20        |
| Increased tearing                                           | 24.1        | .73         | 0.94        | 0.18        |

|                                                       |             |             |             |             |
|-------------------------------------------------------|-------------|-------------|-------------|-------------|
| Inability to close eyes                               | 24.1        | .82         | 1.13        | 0.20        |
| Eye irritation                                        | 19.4        | .70         | 0.87        | 0.14        |
| Having crossed eyes                                   | 12.2        | 1.29        | 1.40        | 0.16        |
| <b>Communication issues</b>                           | <b>81.8</b> | <b>1.92</b> | <b>1.32</b> | <b>1.57</b> |
| Slurred speech                                        | 68.6        | 2.03        | 1.46        | 1.39        |
| Quiet voice                                           | 39.3        | 1.83        | 1.33        | 0.72        |
| Impaired speech                                       | 73.6        | 2.16        | 1.54        | 1.59        |
| Difficulty communicating with others                  | 76.4        | 2.05        | 1.46        | 1.56        |
| Difficulty writing                                    | 75.7        | 2.10        | 1.43        | 1.59        |
| Impaired facial expression                            | 64.7        | 1.76        | 1.41        | 1.14        |
| Poor handwriting                                      | 79.0        | 2.16        | 1.45        | 1.70        |
| Poor pronunciation                                    | 74.8        | 2.07        | 1.41        | 1.55        |
| Drooping eyelids                                      | 49.3        | 1.33        | 1.33        | 0.66        |
| Not wanting to talk because of voice                  | 19.1        | 1.89        | 1.37        | 0.36        |
| 49 k) Having to repeat oneself often                  | 68.4        | 1.83        | 1.43        | 1.25        |
| Inability to smile                                    | 41.0        | 1.42        | 1.38        | 0.58        |
| Inability to whistle                                  | 53.6        | 1.68        | 1.60        | 0.90        |
| Facial weakness                                       | 70.7        | 1.46        | 1.42        | 1.03        |
| Inability to wink                                     | 43.8        | 1.33        | 1.60        | 0.58        |
| Embarrassment while talking in public                 | 28.9        | 1.28        | 1.23        | 0.37        |
| Being non-verbal                                      | 23.4        | 2.28        | 1.49        | 0.53        |
| Unable to maintain conversation due to attention span | 34.6        | 1.26        | 1.26        | 0.43        |
| Slow speech                                           | 37.0        | 1.52        | 1.37        | 0.56        |
| The need for sign language to communicate             | 19.3        | 1.78        | 1.65        | 0.34        |
| <b>Difficultly with medication side effects</b>       | <b>20.9</b> | <b>1.11</b> | <b>1.10</b> | <b>0.23</b> |
